# Supplementary material
Source: MDPI journal article supplement (https://www.mdpi.com/2073-4395/14/3/615)
Supplement: s1 [file s1]

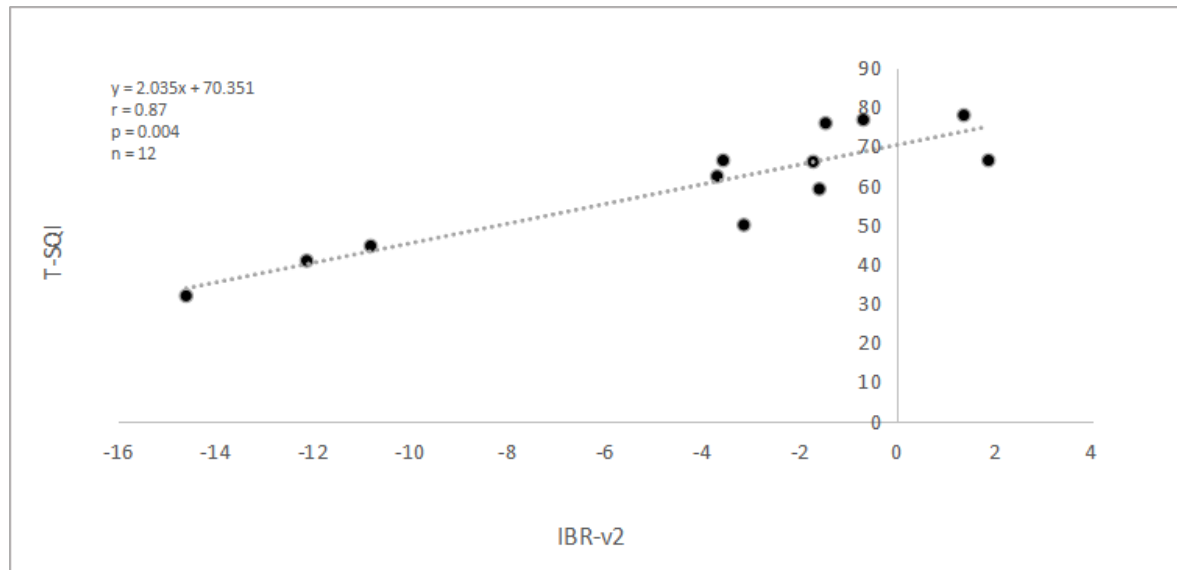

**Fig. S1.** Relationship between T-SQI and IBRv2 scores in response to enzymatic activities of vermicompost with added biochar.
